# Supplementary material for: Microporous spiro-centered poly(benzimidazole) networks: preparation, characterization, and gas sorption properties
Source: Royal Society of Chemistry journal article supplement (doi:10.1039/c4py00954a), 2014-09-29
Supplement: c4py00954a1.pdf [file c4py00954a1.pdf]

Electronic supplementary information (ESI) for

**Microporous spiro-centered poly(benzimidazole)  
networks: preparation, characterization, and gas  
sorption properties**

Yan-Chao Zhao,<sup>†,‡</sup> Tao Wang,<sup>†</sup> Li-Min Zhang,<sup>†</sup> Yi Cui,<sup>†,‡</sup> Bao-Hang Han<sup>\*,†</sup>

<sup>†</sup> *National Center for Nanoscience and Technology, Beijing 100190, China*

<sup>‡</sup> *Graduate University of Chinese Academy of Sciences, Beijing 100049,  
China*

Tel: +86 10 8254 5576. Email: [hanbh@nanoctr.cn](mailto:hanbh@nanoctr.cn)

*Synthesis of 3,3,3',3'-tetramethyl-1,1'-spirobisindane-5,5',6,6'-tetrone*

The monomer 5,5',6,6'-tetrahydroxy-3,3,3',3'-tetramethyl-1,1'-spirobisindane (100 mg) was suspended in ethanol (10.0 mL). To the suspension, a mixture of concentrated nitric acid (1.00 mL) and glacial acetic acid (1.00 mL) was added slowly while the temperature was kept at 0–5 °C. The mixture was stirred at room temperature for 24 h. The tetrone product was then collected by filtration and washed with water and ethanol. After dried at 80 °C in a vacuum oven, a brown solid was obtained (72 % yield). M.p.: >300 °C; <sup>1</sup>H NMR (400 MHz, *d*<sup>6</sup>-DMSO): δ (ppm) 6.36 (s, 2H, Ar-*H*), 6.33 (s, 2H, Ar-*H*), 2.28 (dd, *J* = 13.2 Hz, *J* = 35.6 Hz, 4H, -CH<sub>2</sub>-), 1.31 (s, 12H, -CH<sub>3</sub>).

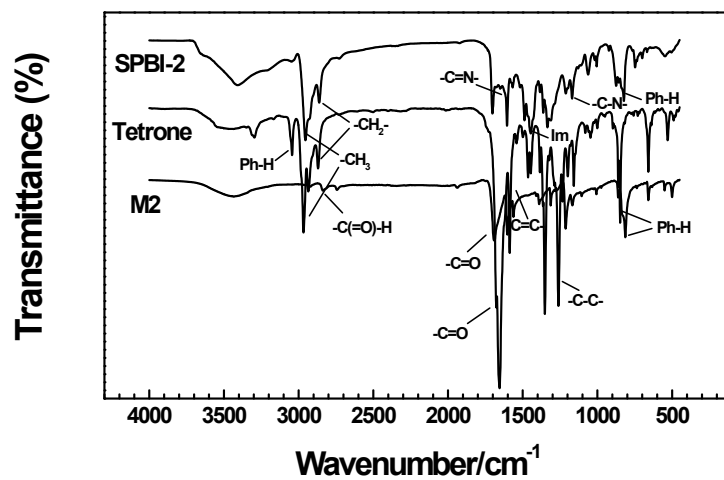

**Fig. S1.** FT-IR spectra of 4,4'-biphenyldicarboxaldehyde, tetrone monomer, and **SPBI-2**.

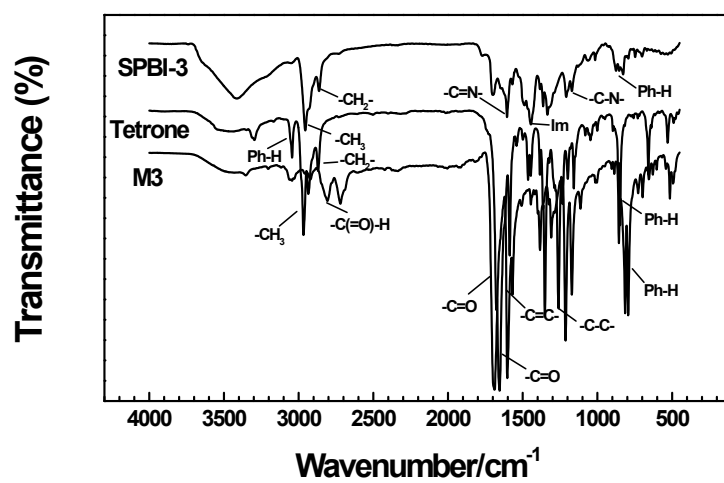

**Fig. S2.** FT-IR spectra of 1,3,5-tris(4-formylphenyl)benzene, tetrone monomer, and **SPBI-2**.

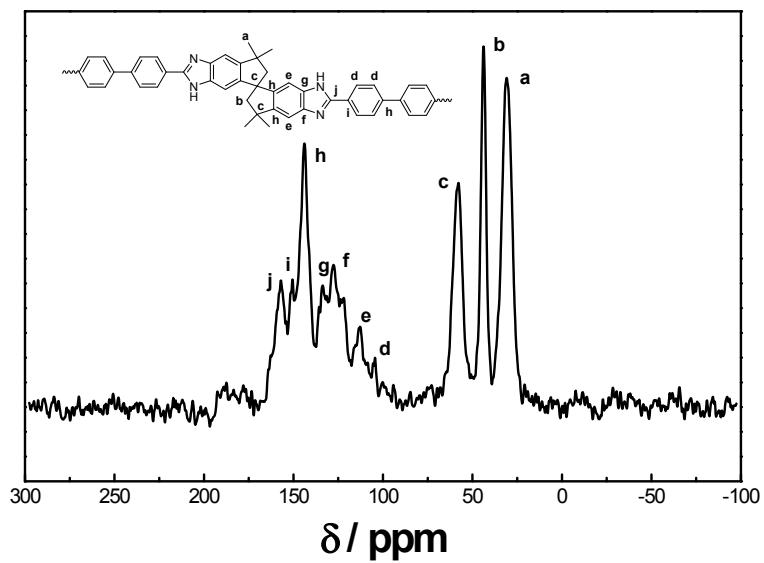

**Fig. S3.** Solid-state  $^{13}\text{C}$  CP/MAS spectrum of **SPBI-2** recorded at the MAS rate of 5 Hz.

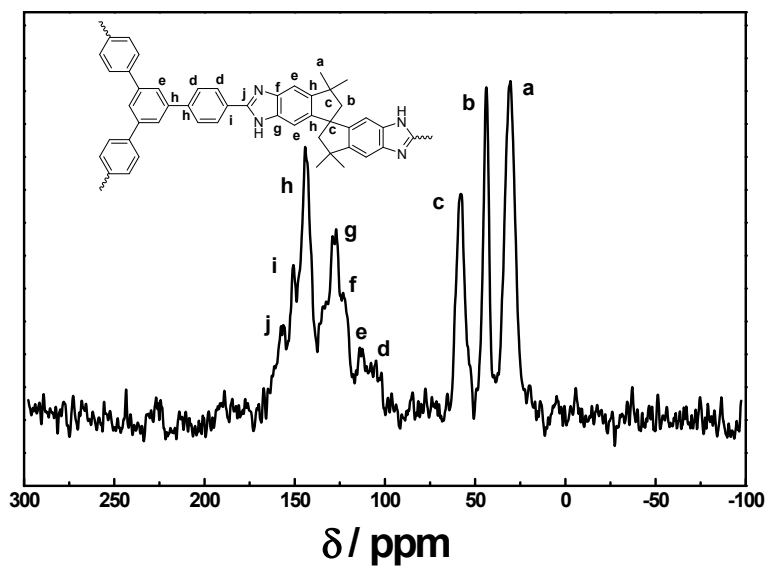

**Fig. S4.** Solid-state  $^{13}\text{C}$  CP/MAS spectrum of **SPBI-3** recorded at the MAS rate of 5 Hz.

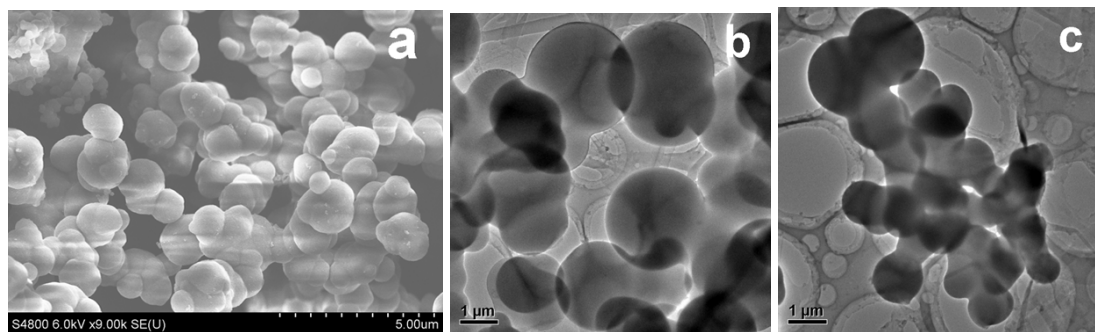

**Fig. S5.** SEM (a) and TEM (b and c) images of **SPBI-1** (b), **SPBI-2** (c), and **SPBI-3** (a)
